# Supplementary material for: Advanced CKD Care and Decision Making: Which Health Care Professionals Do Patients Rely on for CKD Treatment and Advice?
Source: PubMed Central journal article supplement — Kidney Med. 2020 Jun 15;2(5):532–542.e1. doi: 10.1016/j.xkme.2020.05.008 (PMC7568072; doi:10.1016/j.xkme.2020.05.008), 2020-06-15
Supplement: mmc1.pdf [file mmc1.pdf]

Table S1. Comparison of sociodemographic and clinical characteristics between PREPARE NOW participants who did and did not complete the ‘long’ questionnaire and the provider reliance question

| Characteristics                          | Overall<br>(N = 676) | Did Not Complete<br>(non-participant)<br>(n = 223) | Completed<br>(participant)<br>(n = 453) | p       |
|------------------------------------------|----------------------|----------------------------------------------------|-----------------------------------------|---------|
| <b>Sociodemographic Characteristics</b>  |                      |                                                    |                                         |         |
| Age, Mean (SD)                           | 73 (12)              | 75 (10)                                            | 71 (12)                                 | < 0.001 |
| Sex                                      |                      |                                                    |                                         | 0.82    |
| Female                                   | 399 (59%)            | 133 (60%)                                          | 266 (59%)                               |         |
| Male                                     | 277 (41%)            | 90 (40%)                                           | 187 (41%)                               |         |
| Race/Ethnicity                           |                      |                                                    |                                         | 0.59    |
| White                                    | 656 (97%)            | 218 (98%)                                          | 438 (97%)                               |         |
| Other Race/Ethnicity                     | 16 (2%)              | 3 (1%)                                             | 13 (3%)                                 |         |
| Don't Know                               | 2 (0.3%)             | 0 (0.0%)                                           | 2 (0.4%)                                |         |
| Income                                   |                      |                                                    |                                         | < 0.001 |
| Less than \$30,000                       | 198 (29%)            | 52 (23%)                                           | 146 (32%)                               |         |
| \$30,000 to \$59,999                     | 160 (24%)            | 46 (21%)                                           | 114 (25%)                               |         |
| \$60,000 and above                       | 95 (14%)             | 13 (6%)                                            | 82 (18%)                                |         |
| Missing/Refused/Don't Know               | 223 (33%)            | 112 (50%)                                          | 111 (25%)                               |         |
| Education                                |                      |                                                    |                                         | 0.001   |
| Less than High School                    | 97 (14%)             | 39 (18%)                                           | 58 (13%)                                |         |
| High School Graduate/GED                 | 465 (69%)            | 164 (74%)                                          | 301 (66%)                               |         |
| College Graduate                         | 108 (16%)            | 18 (8%)                                            | 90 (20%)                                |         |
| Missing/Refused/Don't Know               | 6 (0.9%)             | 2 (0.9%)                                           | 4 (0.9%)                                |         |
| Employment                               |                      |                                                    |                                         | < 0.001 |
| Working/Looking for Work                 | 114 (17%)            | 29 (13%)                                           | 85 (19%)                                |         |
| Unemployed                               | 6 (0.9%)             | 2 (0.9%)                                           | 4 (0.9%)                                |         |
| Retired due to Disability                | 73 (11%)             | 14 (6%)                                            | 59 (13%)                                |         |
| Retired                                  | 446 (66%)            | 151 (68%)                                          | 295 (65%)                               |         |
| Missing/Refused/Don't Know               | 37 (6%)              | 27 (12%)                                           | 10 (2%)                                 |         |
| Insurance                                |                      |                                                    |                                         | 0.001   |
| Commercial                               | 130 (19%)            | 32 (14%)                                           | 98 (22%)                                |         |
| Govt/Other                               | 5 (0.7%)             | 1 (0.4%)                                           | 4 (0.9%)                                |         |
| Medicaid                                 | 40 (6%)              | 5 (2%)                                             | 35 (8%)                                 |         |
| Medicare                                 | 501 (74%)            | 185 (83%)                                          | 316 (70%)                               |         |
| <b>Clinical Characteristics</b>          |                      |                                                    |                                         |         |
| eGFR, Mean (SD)                          | 33 (12)              | 33 (11)                                            | 33 (12)                                 | 0.78    |
| CKD Stage                                |                      |                                                    |                                         | 0.63    |
| Stage 2 (eGFR = 60)                      | 11 (2%)              | 2 (0.9%)                                           | 9 (2%)                                  |         |
| Stage 3a (60 > eGFR ≥ 45)                | 84 (12%)             | 28 (13%)                                           | 56 (12%)                                |         |
| Stage 3b (45 > eGFR ≥ 30)                | 316 (47%)            | 111 (50%)                                          | 205 (45%)                               |         |
| Stage 4 (30 > eGFR ≥ 15)                 | 225 (33%)            | 68 (31%)                                           | 157 (35%)                               |         |
| Stage 5 (eGFR < 15)                      | 40 (6%)              | 14 (6%)                                            | 26 (6%)                                 |         |
| Charlson Comorbidity Index, Median [IQR] | 5 [3-7]              | 5 [4-7]                                            | 5 [3-7]                                 | 0.05    |
| Cardiovascular Disease                   |                      |                                                    |                                         | 0.003   |
| Yes                                      | 349 (52%)            | 133 (38%)                                          | 216 (48%)                               |         |
| Diabetes                                 |                      |                                                    |                                         | 0.58    |
| Yes                                      | 390 (58%)            | 132 (34%)                                          | 258 (57%)                               |         |

*Barrett et al, Kidney Medicine, "Advanced CKD Care and Decision-Making: Which Health Care Professionals Do Patients Rely on for CKD Treatment and Advice?"*

Abbreviations: SD, standard deviation; GED, general equivalency diploma; Govt, government; CKD, chronic kidney disease; eGFR, estimated glomerular filtration rate; IQR, interquartile range
